# Supplementary material for: Burden of pulmonary hypertension in patients with portal hypertension in the United States: a retrospective database study
Source: PubMed Central journal article supplement — Pulm Circ. 2020 Nov 23;10(4):2045894020962917. doi: 10.1177/2045894020962917 (PMC7686640; doi:10.1177/2045894020962917), 2020-11-23
Supplement: sj-pdf-1-pul-10.1177_2045894020962917.pdf [file sj-pdf-1-pul-10.1177_2045894020962917.pdf]

## Online Supplement

Supplementary Table 1. Ascertainment of patient diagnoses, procedures, and drugs.

| <b>Diagnosis, drug, or procedure</b>       | <b>Definition</b>                                                                                            |
|--------------------------------------------|--------------------------------------------------------------------------------------------------------------|
| <i>Diagnoses</i>                           |                                                                                                              |
| Pulmonary hypertension                     | ICD-9-CM: 416.0, 416.8, 416.9<br>ICD-10-CM: I27.0, I27.2, I27.89, I27.9                                      |
| Portal hypertension                        | ICD-9-CM: 572.3<br>ICD-10-CM: K76.6                                                                          |
| Alcoholic cirrhosis                        | ICD-9-CM: 571.2<br>ICD-10-CM: K70.3x                                                                         |
| Autoimmune hepatitis                       | ICD-9-CM: 571.42<br>ICD-10-CM: K75.4                                                                         |
| Biliary cirrhosis                          | ICD-9-CM: 571.6<br>ICD-10-CM: K74.3–.5                                                                       |
| Cirrhosis                                  | ICD-9-CM: 571.2, 571.5<br>ICD-10-CM: K70.30, K74.0, K74.60, K74.69                                           |
| Hepatitis B                                | ICD-9-CM: 070.2x–.3x, V02.61<br>ICD-10-CM: B16.x, B18.0, B18.1, B19.10, B19.11, Z22.51                       |
| Hepatitis C                                | ICD-9-CM: 070.41, 070.44, 070.51, 070.54, 070.70, 070.71, V02.62<br>ICD-10-CM: B17.1x, B18.2, B19.2x, Z22.52 |
| Non-alcoholic fatty liver disease          | ICD-9-CM: 571.8, 571.9<br>ICD-10-CM: K74.1, K76.0, K76.89, K76.9                                             |
| Non-alcoholic steatohepatitis*             | ICD-10-CM K75.81                                                                                             |
| Viral hepatitis                            | ICD-9-CM: 070.0–.59, 070.7x<br>ICD-10-CM: B15–19                                                             |
| <i>Procedures</i>                          |                                                                                                              |
| Liver transplant                           | ICD-9-CM: V42.7, 50.51, 50.59<br>ICD-10-CM: Z94.4, 0FY00Z0, 0FY00Z1, 0FY00Z2<br>CPT: 47135                   |
| <i>PAH-specific drugs</i>                  |                                                                                                              |
| Ambrisentan (Letairis <sup>®</sup> )       | NDC: 61958080101, 61958080102, 61958080103, 61958080105, 61958080201, 61958080202, 61958080203, 61958080205  |
| Bosentan (Tracleer <sup>®</sup> )          | NDC: 66215010103, 66215010106, 66215010203, 66215010206                                                      |
| Macitentan (Opsumit <sup>®</sup> )         | NDC: 66215050115, 66215050130                                                                                |
| Sildenafil citrate (Revatio <sup>®</sup> ) | NDC: 00069033621, 00069033801, 00069419068, 00093551798, 00378165777, 00591378019, 13668018505, 13668018590, |

| <b>Diagnosis, drug, or procedure</b>                              | <b>Definition</b>                                                                                                                                                                                                                                                                                   |
|-------------------------------------------------------------------|-----------------------------------------------------------------------------------------------------------------------------------------------------------------------------------------------------------------------------------------------------------------------------------------------------|
| Tadalafil (Adcirca <sup>®</sup> )                                 | 16714033801, 31722077690, 33342012110, 42291073090, 42291074990, 42543000590, 43063055010, 43063055030, 43063066830, 43063067610, 50268071715, 55111037290, 55150016613, 59762003301, 60505340405, 60505340409, 65162035109, 65862068890, 68001017605, 68084062221, 68084086921<br>NDC: 66302046760 |
| Epoprostenol sodium (Veletri <sup>®</sup> , Flolan <sup>®</sup> ) | NDC: 00173051700, 00173051900, 00703198501, 00703199501, 20694011101, 20694011201, 66215040101, 66215040201, 66215040301<br>HCPCS: J1325                                                                                                                                                            |
| Iloprost (Ventavis <sup>®</sup> )                                 | NDC: 10148010100, 10148010101, 10148010130, 10148010200, 10148010230, 66215030200, 66215030230, 66215030330<br>HCPCS: Q4080, Q4074                                                                                                                                                                  |
| Oral treprostinil (Orenitram <sup>®</sup> )                       | NDC: 66302030001, 66302030201, 66302031001, 66302032501                                                                                                                                                                                                                                             |
| Inhaled treprostinil (Tyvaso <sup>®</sup> )                       | NDC: 66302020601, 66302020602, 66302020603, 66302020604<br>HCPCS: J7686                                                                                                                                                                                                                             |
| Parental treprostinil (Remodulin <sup>®</sup> )                   | NDC: 66302010101, 66302010201, 66302010501, 66302011001<br>HCPCS: J3285, Q4077, S0114                                                                                                                                                                                                               |
| Selexipag (Uptravi <sup>®</sup> )                                 | NDC: 66215060206, 66215060406, 66215060606, 66215060806, 66215061006, 66215061206, 66215061406, 66215061606, 66215062820                                                                                                                                                                            |
| Riociguat (Adempas <sup>®</sup> )                                 | NDC: 50419025001, 50419025003, 50419025091, 50419025101, 50419025103, 50419025191, 50419025201, 50419025203, 50419025291, 50419025301, 50419025303, 50419025391, 50419025401                                                                                                                        |

CPT: Current Procedural Terminology; HCPCS: Healthcare Common Procedure Coding System; ICD-9-CM: International Classification of Diseases, Ninth Revision, Clinical Modification; ICD-10-CM: International Classification of Diseases, Tenth Revision, Clinical Modification; NDC: National Drug Code.

\*The ICD-10-CM code for non-alcoholic steatohepatitis was not available in the US until October 2015 (i.e., 3 months after the start of the study period).
